# Supplementary material
Source: PubMed Central journal article supplement (PMC6110321)

SUPPLEMENTARY DATA

**Supplementary Figure S1.** Erlotinib treatment had no effect on blood pressure. **A:** Erlotinib treatment of *eNOS*<sup>-/-</sup>*db/db* mice from 8 to 20 weeks had no effect on blood pressure as determined by carotid catheterization. N = 6 in vehicle group and n = 4 in erlotinib group. **B:** Erlotinib treatment from 8 to 20 weeks had no effect on blood pressure as determined by tail-cuff method. N = 7 in vehicle group and n = 11 in erlotinib group.

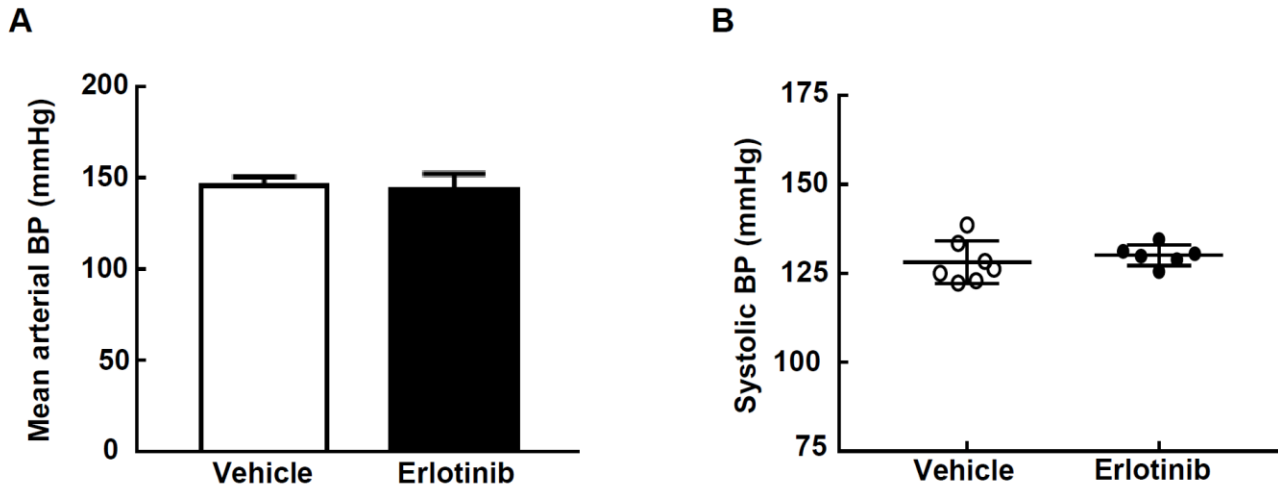

**Supplementary Figure S2.** Erlotinib treatment slowed podocyte loss in *eNOS*<sup>-/-</sup>*db/db* mice. Erlotinib treatment from 8 to 20 weeks decreased podocyte loss as indicated by immunofluorescent staining of WT1, a marker of podocyte nucleus. Original magnification: x 400.

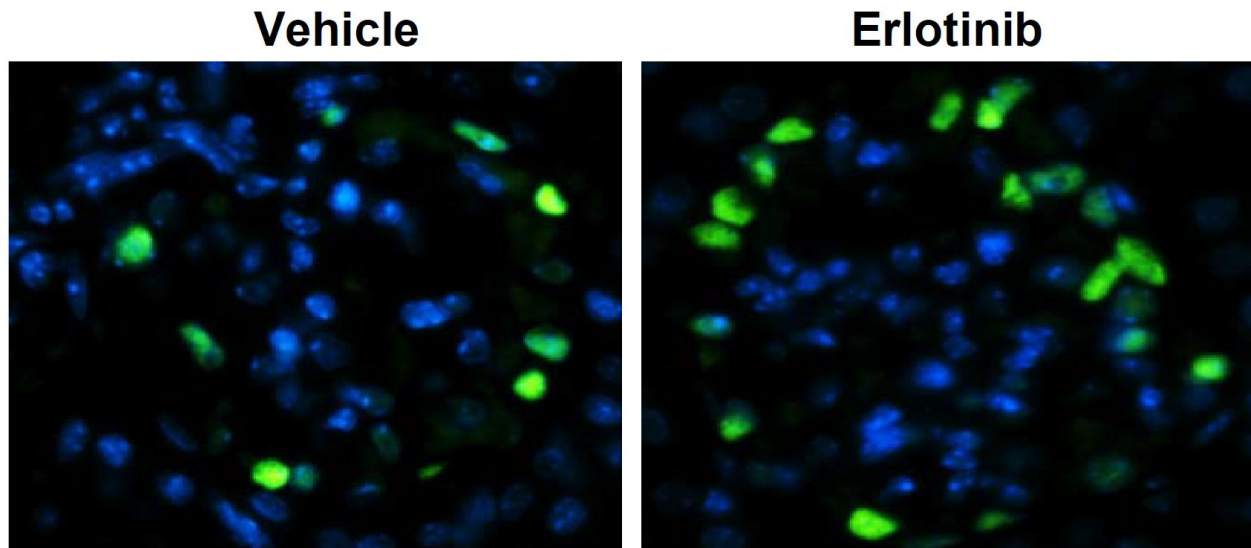

SUPPLEMENTARY DATA

**Supplementary Figure S3.** Erlotinib treatment decreased gains of fat tissue mass in  $eNOS^{-/-} db/db$  mice. Erlotinib treatment from 8 to 20 weeks of age in  $eNOS^{-/-} db/db$  led to decreases in body weight (**A**), fat tissue weight (**B**), and resultant ratio of fat tissue weight vs. body weight (**C**). \*\*\* $P < 0.001$ ;  $n = 9$  in vehicle group and  $n = 7$  in erlotinib group.

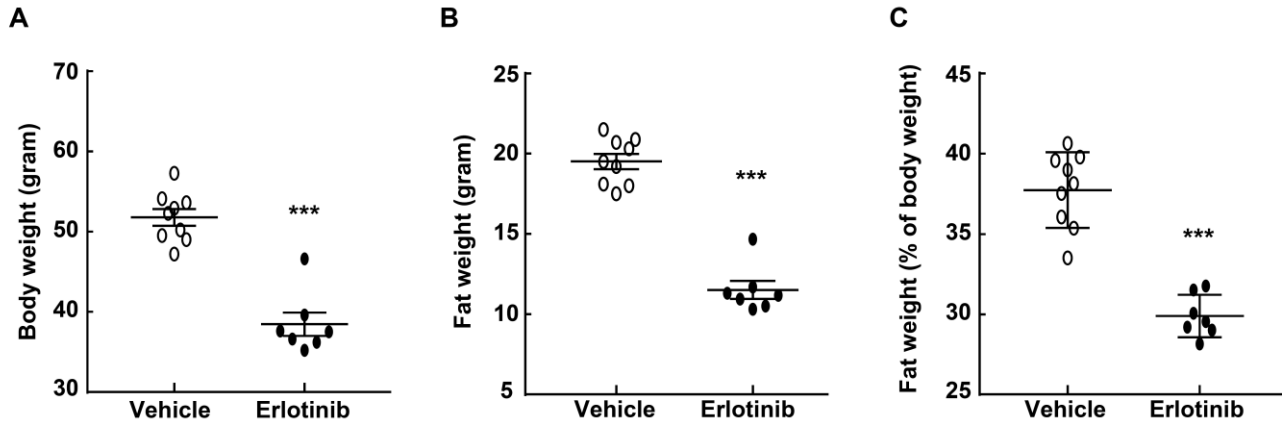

**Supplementary Figure S4.** Erlotinib treatment had no effect on renal adiponectin receptor expression in  $eNOS^{-/-} db/db$  mice. Erlotinib treatment from 8 to 20 weeks of age in  $eNOS^{-/-} db/db$  had no effect on renal mRNA levels of both adiponectin receptor-1 (adipoR1) and -2(adipoR2).  $N = 9$  in vehicle group and  $n = 7$  in erlotinib group.

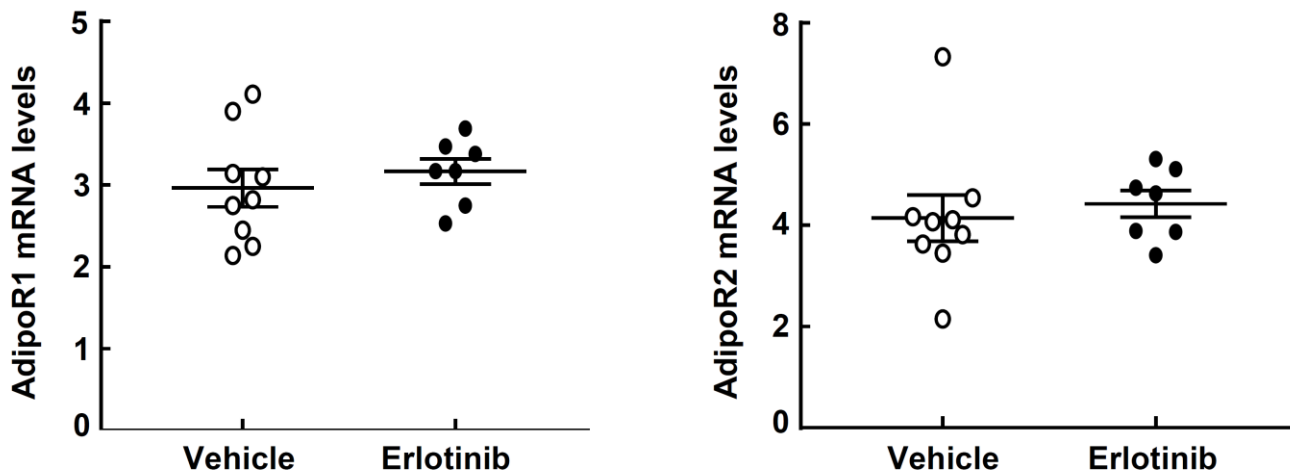

## SUPPLEMENTARY DATA

**Supplementary Figure S5.** Genetic inhibition of EGFR signaling pathway decreased the gain of body weight in eNOS<sup>-/-</sup>db/db mice. **A:** *Waved 2* eNOS<sup>-/-</sup>db/db mice with EGFR tyrosine kinase deficiency had less gain of body weight from 8 to 16 weeks of age. \**P* < 0.05, \*\**P* < 0.01, \*\*\**P* < 0.001; n = 16 in each group. **B:** *Waved 1* eNOS<sup>-/-</sup>db/db mice with null TGFα showed less gain of body weight from 8 to 20 weeks of age. \**P* < 0.05, \*\**P* < 0.01, \*\*\**P* < 0.001; n = 7 in wild type group and n = 15 in *waved 1* group.

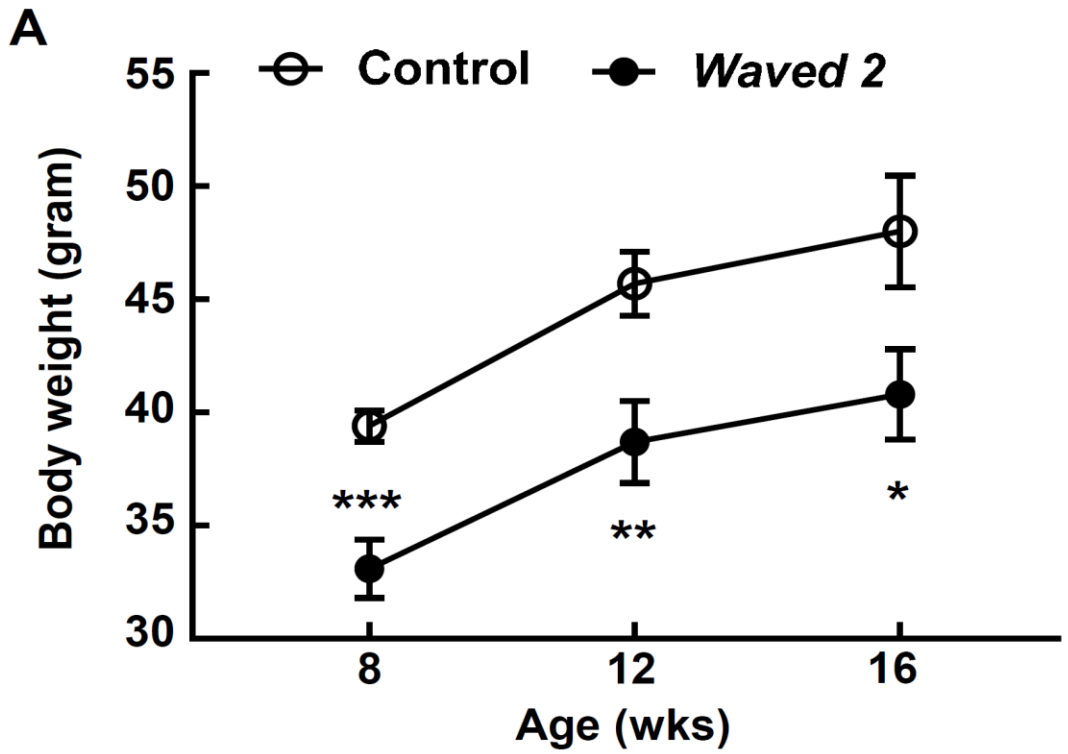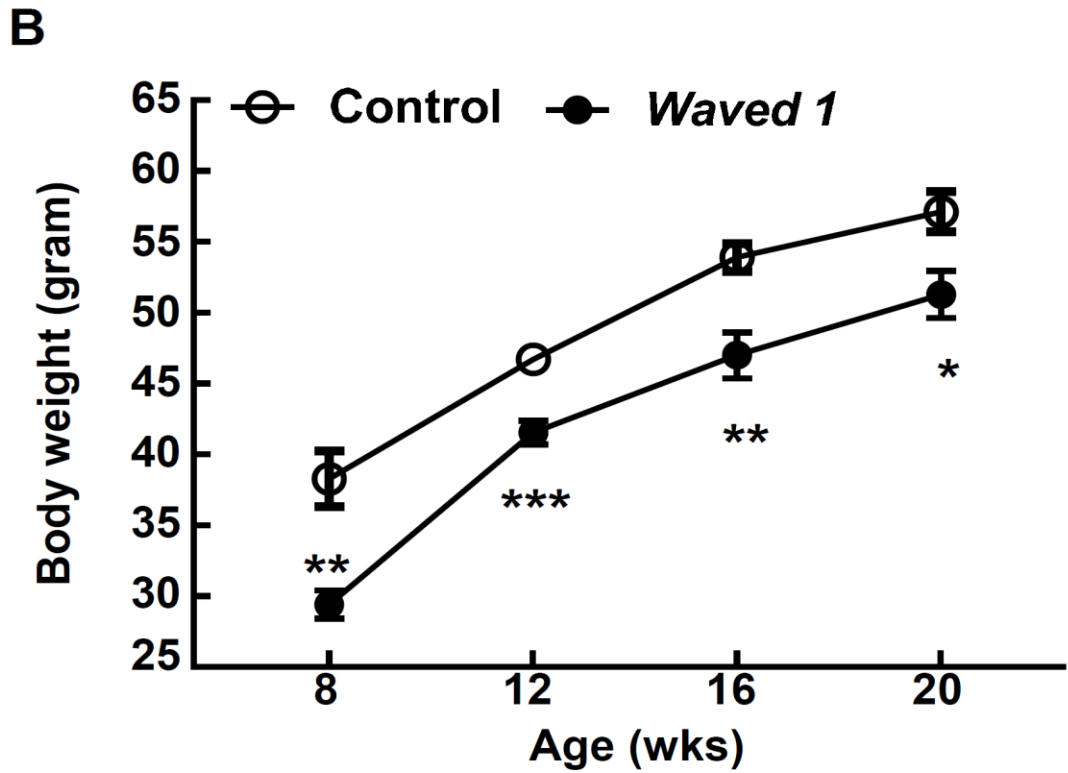

SUPPLEMENTARY DATA

**Supplementary Figure S6.** Genetic inhibition of EGFR signaling pathway decreased islet macrophage infiltration. Both *waved 2*  $eNOS^{-/-}db/db$  mice with EGFR tyrosine kinase deficiency (A) and *waved 1*  $eNOS^{-/-}db/db$  mice with null  $TGF\alpha$ (B) exhibited less islet macrophage infiltration, as indicated by F4/80 staining, a marker of macrophages. Original magnification: x 250.

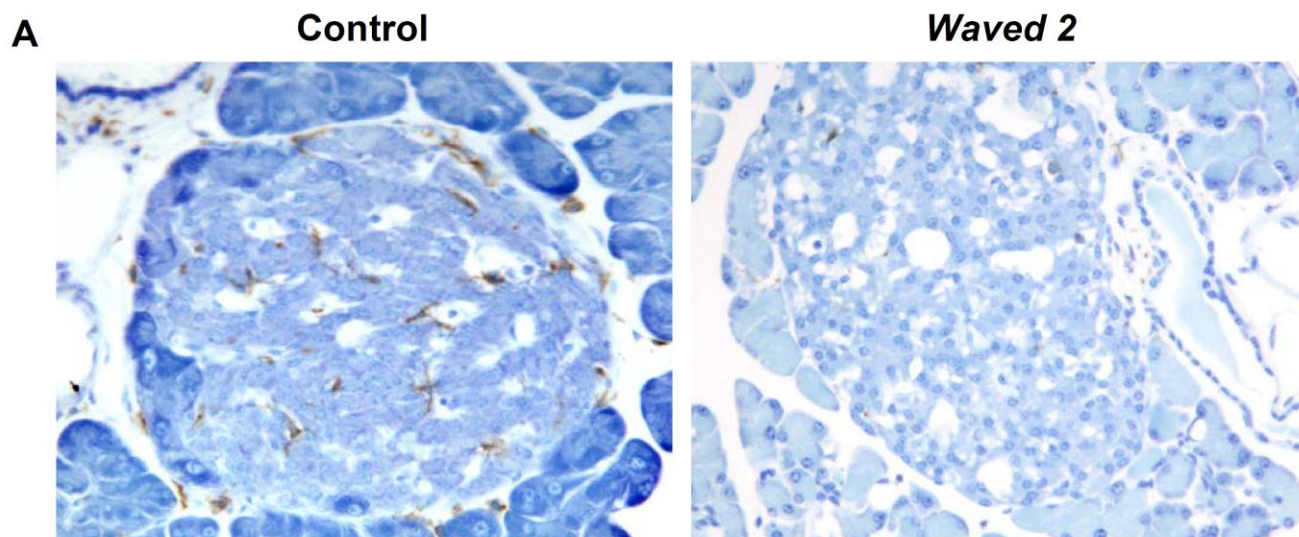

F4/80: marker of macrophages.

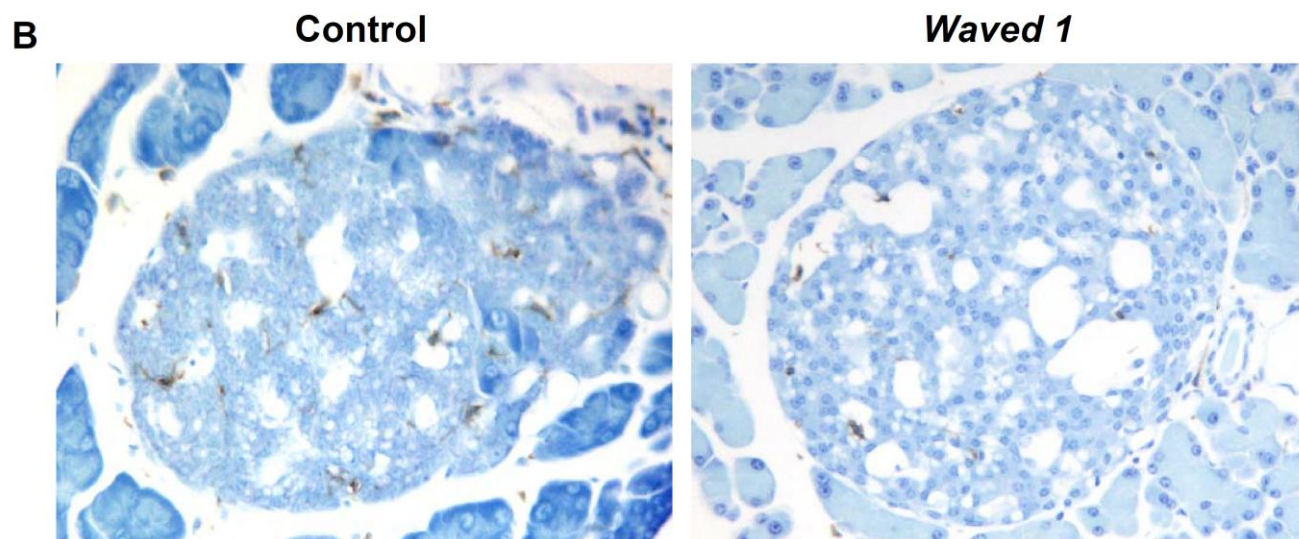

F4/80: marker of macrophages.

SUPPLEMENTARY DATA

**Supplementary Figure S7.** *Waved 2* eNOS<sup>-/-</sup> db/db mice with EGFR tyrosine kinase deficiency had similar blood pressure to corresponding controls as determined by tail-cuff method. N = 7 in control group and n = 11 in *waved 2* group.

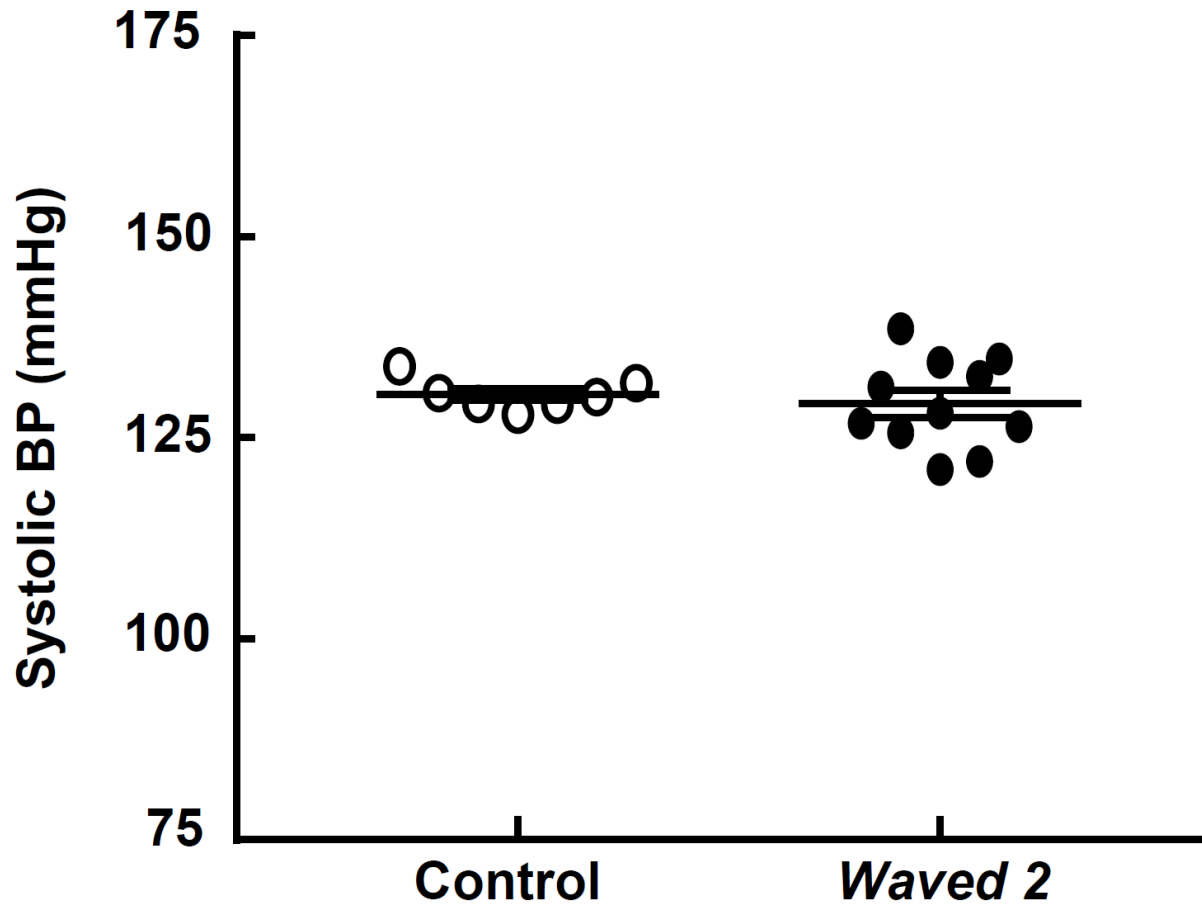

Supplement: DB171513SupplementaryData.pdf [file DB171513SupplementaryData.pdf]
